# Supplementary material
Source: publisher site journal article supplement (https://www.dovepress.com/get_supplementary_file.php?f=324645.docx)
Supplement: Supplementary file 1 [file get_supplementary_file.php]

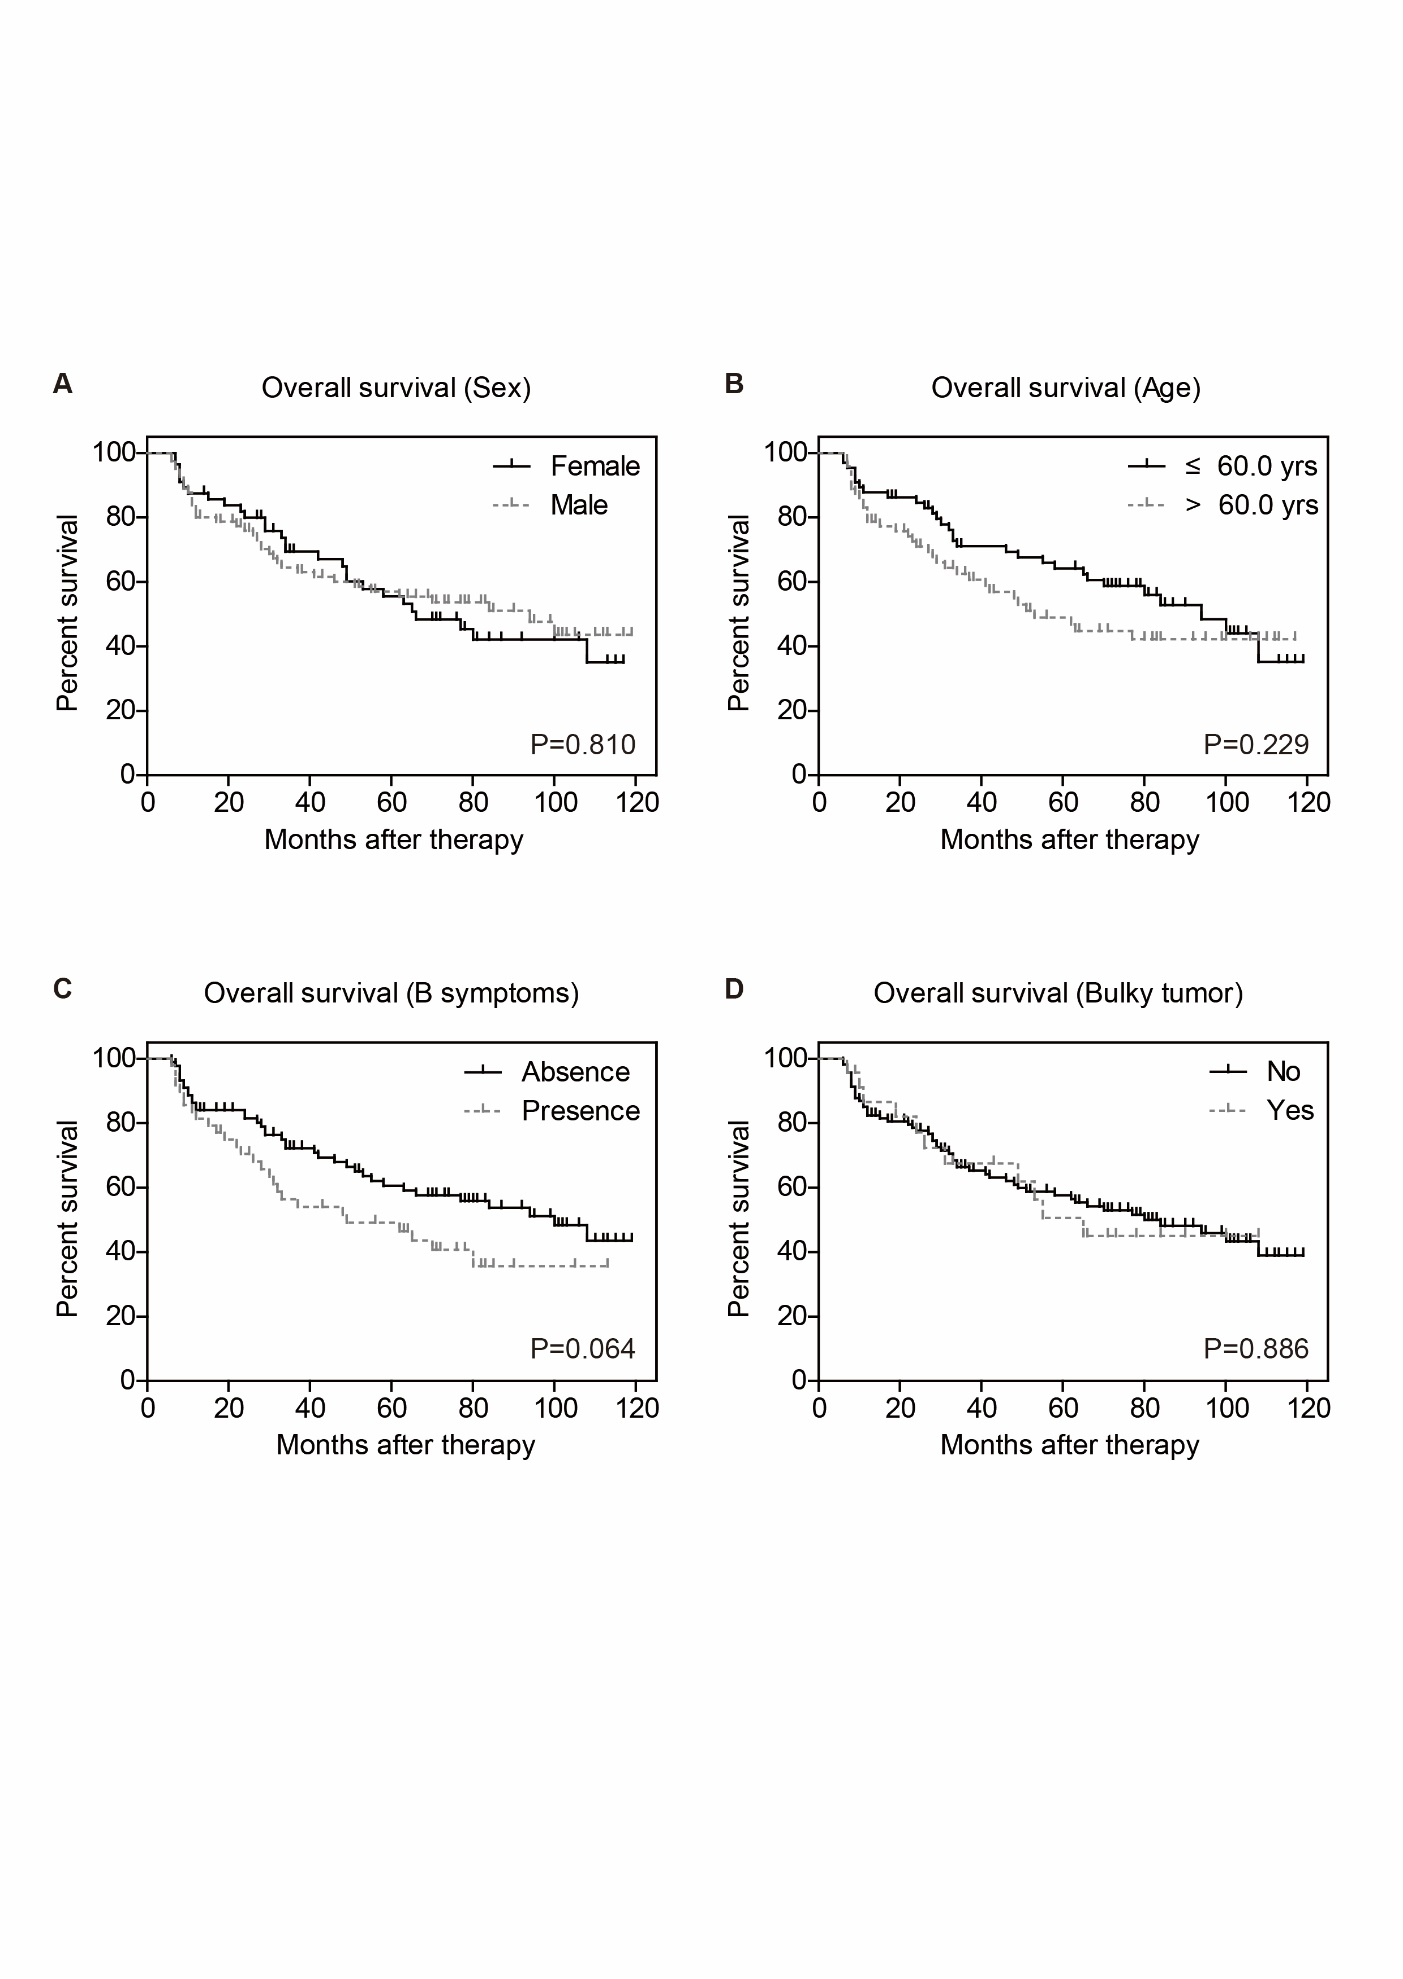


**Figure S1**. Kaplan-Meier survival analyses of enrolled DLBCL patients.

The survival curves were plotted according to patients’ sex (A), age (B), B symptoms (C), and Bulky tumor (D).
